# Supplementary material for: Comparative proteome analysis of Saccharomyces cerevisiae: A global overview of in vivo targets of the yeast activator protein 1
Source: PubMed Central journal article supplement (PMC3476450; doi:10.1186/1471-2164-13-230), 2012-06-09
Supplement: 1471-2164-13-230-S1.pdf [file 1471-2164-13-230-S1.pdf]

| Spot # in<br>MS Datasets | Working name<br>(spot on the gel) | Protein | Description                                | ORF     | Mascot<br>score | 95% Confidence<br>threshold | Expectation<br>value | Precursor<br>mass [Da] | Peptides<br>matched | Sequence<br>coverage [%] |
|--------------------------|-----------------------------------|---------|--------------------------------------------|---------|-----------------|-----------------------------|----------------------|------------------------|---------------------|--------------------------|
| 1                        | 61                                | Fba1p   | Fructose-bisphosphate aldolase             | YKL060C | 145             | 51                          | 2.30E-11             | 39596                  | 12 of 21            | 31.5                     |
| 2                        | 127                               | Fba1p   | Fructose-bisphosphate aldolase             | YKL060C | 61              | 51                          | 0.0056               | 39596                  | 7 of 22             | 22.3                     |
| 3                        | 24                                | Pgi1p   | Glucose-6-phosphate isomerase              | YBR196C | 125             | 51                          | 2.30E-09             | 61261                  | 17 of 40            | 35.2                     |
| 4                        | 96                                | Pgi1p   | Glucose-6-phosphate isomerase              | YBR196C | 80              | 51                          | 7.60E-05             | 61261                  | 12 of 36            | 15.9                     |
| 5                        | 119                               | Hxk2p   | Hexokinase-2                               | YGL253W | 144             | 51                          | 2.90E-11             | 53908                  | 18 of 46            | 47.5                     |
| 6                        | 81                                | Tdh1p   | Glyceraldehyde-3-phosphate dehydrogenase 1 | YJL052W | 80              | 51                          | 6.60E-05             | 35728                  | 7 of 18             | 27.1                     |
| 7                        | 80                                | Tdh2p   | Glyceraldehyde-3-phosphate dehydrogenase 2 | YJR009C | 93              | 51                          | 3.90E-06             | 35824                  | 8 of 19             | 28.3                     |
| 8                        | 72                                | Tdh3p   | Glyceraldehyde-3-phosphate dehydrogenase 3 | YGR192C | 89              | 51                          | 9.30E-06             | 35724                  | 7 of 15             | 33.4                     |
| 9                        | 45                                | Pgk1p   | Phosphoglycerate kinase                    | YCR012W | 180             | 51                          | 7.20E-15             | 44711                  | 15 of 24            | 49.5                     |
| 10                       | 65                                | Pgk1p   | Phosphoglycerate kinase                    | YCR012W | 97              | 51                          | 1.40E-06             | 44711                  | 9 of 16             | 27.9                     |
| 11                       | 92                                | Gpm1p   | Phosphoglycerate mutase 1                  | YKL152C | 178             | 51                          | 1.10E-14             | 27592                  | 15 of 29            | 44.5                     |
| 12                       | 34                                | Eno2p   | Enolase 2                                  | YHR174W | 218             | 51                          | 1.10E-18             | 46885                  | 22 of 49            | 44.6                     |
| 13                       | 35                                | Eno2p   | Enolase 2                                  | YHR174W | 204             | 51                          | 2.90E-17             | 46885                  | 20 of 30            | 56.1                     |
| 14                       | 38                                | Eno2p   | Enolase 2                                  | YHR174W | 178             | 51                          | 1.10E-14             | 46885                  | 18 of 41            | 55.1                     |
| 15                       | 71                                | Eno2p   | Enolase 2                                  | YHR174W | 124             | 51                          | 2.90E-09             | 46885                  | 10 of 17            | 23.3                     |
| 16                       | 76                                | Eno2p   | Enolase 2                                  | YHR174W | 118             | 51                          | 1.10E-08             | 46885                  | 12 of 26            | 24.9                     |
| 17                       | 78                                | Eno2p   | Enolase 2                                  | YHR174W | 126             | 51                          | 1.80E-09             | 46885                  | 16 of 32            | 32.3                     |
| 18                       | 16                                | Cdc19p  | Pyruvate kinase 1                          | YAL038W | 113             | 51                          | 3.60E-08             | 54510                  | 10 of 18            | 22.4                     |
| 19                       | 41                                | Cdc19p  | Pyruvate kinase 1                          | YAL038W | 175             | 51                          | 2.30E-14             | 54510                  | 19 of 45            | 31.2                     |
| 20                       | 99                                | Cdc19p  | Pyruvate kinase 1                          | YAL038W | 144             | 51                          | 2.90E-11             | 54510                  | 15 of 27            | 25.8                     |
| 21                       | 18                                | Pdc1p   | Pyruvate decarboxylase isozyme 1           | YLR044C | 92              | 51                          | 4.10E-06             | 61457                  | 10 of 25            | 25                       |
| 22                       | 19                                | Pdc1p   | Pyruvate decarboxylase isozyme 1           | YLR044C | 100             | 51                          | 7.30E-07             | 61457                  | 16 of 46            | 38.2                     |
| 23                       | 21                                | Pdc1p   | Pyruvate decarboxylase isozyme 1           | YLR044C | 62              | 51                          | 0.0046               | 61457                  | 6 of 13             | 14.9                     |
| 24                       | 36                                | Pdc1p   | Pyruvate decarboxylase isozyme 1           | YLR044C | 82              | 51                          | 4.60E-05             | 61457                  | 9 of 23             | 20.2                     |
| 25                       | 46                                | Pdc1p   | Pyruvate decarboxylase isozyme 1           | YLR044C | 106             | 51                          | 1.80E-07             | 61457                  | 11 of 25            | 22.2                     |
| 26                       | 49                                | Pdc1p   | Pyruvate decarboxylase isozyme 1           | YLR044C | 76              | 51                          | 0.00019              | 61457                  | 11 of 30            | 22.9                     |
| 27                       | 52                                | Adh1p   | Alcohol dehydrogenase 1                    | YOL086C | 104             | 51                          | 2.90E-07             | 36826                  | 9 of 21             | 26.1                     |
| 28                       | 115                               | Ald6p   | Magnesium-activated aldehyde dehydrogenase | YPL061W | 127             | 51                          | 1.40E-09             | 54380                  | 17 of 41            | 34.6                     |
| 29                       | 25                                | Dld3p   | D-lactate dehydrogenase 3                  | YEL071W | 81              | 51                          | 6.00E-05             | 55190                  | 7 of 12             | 16.7                     |
| 30                       | 11                                | Tkl1p   | Transketolase 1                            | YPR074C | 151             | 51                          | 5.70E-12             | 73760                  | 14 of 22            | 20.3                     |
| 31                       | 14                                | Tkl1p   | Transketolase 1                            | YPR074C | 92              | 51                          | 5.00E-06             | 73760                  | 18 of 64            | 22.1                     |
| 32                       | 32                                | Gnd1p   | 6-phosphogluconate dehydrogenase 1         | YHR183W | 76              | 51                          | 0.0002               | 53509                  | 8 of 21             | 16.2                     |
| 33                       | 30                                | Shm2p   | Serine hydroxymethyltransferase, cytosolic | YLR058C | 100             | 51                          | 7.20E-07             | 52186                  | 10 of 18            | 20.9                     |
| 34                       | 117                               | Aro9p   | Aromatic amino acid aminotransferase 2     | YHR137W | 53              | 51                          | 0.033                | 58490                  | 8 of 28             | 18.3                     |
| 35                       | 31                                | Lys9p   | Saccharopine dehydrogenase                 | YNR050C | 74              | 51                          | 0.00029              | 48887                  | 7 of 17             | 15.5                     |
| 36                       | 4                                 | Eft1p   | Elongation factor 2                        | YOR133W | 92              | 51                          | 5.00E-06             | 93230                  | 14 of 27            | 17.9                     |
| 37                       | 34                                | Eft1p   | Elongation factor 2                        | YOR133W | 77              | 51                          | 0.00015              | 93230                  | 14 of 49            | 20                       |
| 38                       | 2                                 | Yef3p   | Elongation factor 3A                       | YLR249W | 186             | 70                          | 0.00032              | 115872                 | 32 of 63            | 33.2                     |
| 39                       | 5                                 | Gus1p   | Glutamyl-tRNA synthetase                   | YGL245W | 192             | 70                          | 3.30E-14             | 80972                  | 20 of 31            | 29.8                     |

|    |     |        |                                                    |         |     |    |          |        |          |      |
|----|-----|--------|----------------------------------------------------|---------|-----|----|----------|--------|----------|------|
| 40 | 44  | Tef4p  | Elongation factor 1-gamma 2                        | YKL081W | 62  | 51 | 0.0051   | 46491  | 7 of 19  | 16.5 |
| 41 | 97  | Rps7ap | 40S ribosomal protein S7-A                         | YOR096W | 90  | 51 | 7.40E-06 | 21609  | 7 of 15  | 18.9 |
| 42 | 109 | Grs1p  | Glycyl-tRNA synthetase 1                           | YBR121C | 109 | 70 | 6.60E-06 | 75364  | 17 of 47 | 29.5 |
| 43 | 7   | Kar2p  | 78 kDa glucose-regulated protein homolog           | YJL034W | 134 | 51 | 2.90E-10 | 74422  | 12 of 18 | 19.6 |
| 44 | 83  | Rpl5p  | 60S ribosomal protein L5                           | YPL131W | 102 | 51 | 4.60E-07 | 33694  | 11 of 35 | 43   |
| 45 | 77  | Rpp0p  | 60S acidic ribosomal protein P0                    | YLR340W | 104 | 51 | 2.90E-07 | 33696  | 8 of 16  | 25.6 |
| 46 | 89  | Rps3p  | 40S ribosomal protein S3                           | YNL178W | 124 | 51 | 2.90E-09 | 26486  | 10 of 20 | 58   |
| 47 | 111 | Pab1p  | Polyadenylate-binding protein                      | YER165W | 147 | 51 | 1.10E-09 | 64304  | 18 of 42 | 37   |
| 48 | 112 | Pab1p  | Polyadenylate-binding protein                      | YER165W | 190 | 51 | 5.30E-14 | 64304  | 21 of 41 | 39.9 |
| 49 | 9   | Ssa1p  | Heat shock protein                                 | YAL005C | 143 | 51 | 3.60E-11 | 69615  | 18 of 44 | 32.4 |
| 50 | 8   | Ssa2p  | Heat shock protein                                 | YLL024C | 130 | 51 | 7.20E-10 | 69427  | 12 of 20 | 23.8 |
| 51 | 120 | Ssa2p  | Heat shock protein                                 | YLL024C | 133 | 51 | 3.60E-10 | 69427  | 16 of 31 | 31.6 |
| 52 | 12  | Ssb1p  | Heat shock protein                                 | YDL229W | 183 | 51 | 3.60E-15 | 66561  | 16 of 24 | 29   |
| 53 | 122 | Ssb1p  | Heat shock protein                                 | YDL229W | 100 | 51 | 7.30E-07 | 66561  | 15 of 42 | 33.6 |
| 54 | 13  | Ssb2p  | Heat shock protein                                 | YNL209W | 212 | 51 | 4.60E-18 | 66554  | 20 of 35 | 40.3 |
| 55 | 106 | Hsp82p | ATP-dependent molecular chaperone                  | YPL240C | 222 | 70 | 3.30E-17 | 81356  | 23 of 38 | 36.7 |
| 56 | 3   | Hsc82p | ATP-dependent molecular chaperone                  | YMR186W | 183 | 51 | 3.60E-15 | 80850  | 20 of 35 | 29.1 |
| 57 | 107 | Sse1p  | Heat shock protein homolog                         | YPL106C | 109 | 70 | 6.60E-06 | 77318  | 14 of 39 | 24.5 |
| 58 | 98  | Tsa1p  | Peroxisome protein TSA1                            | YML028W | 72  | 51 | 0.00048  | 21576  | 6 of 24  | 30.1 |
| 59 | 50  | Oye2p  | NADPH dehydrogenase 2                              | YHR179W | 206 | 51 | 1.80E-17 | 44983  | 17 of 30 | 43.8 |
| 60 | 51  | Oye2p  | NADPH dehydrogenase 2                              | YHR179W | 108 | 51 | 1.10E-07 | 44983  | 9 of 18  | 28   |
| 61 | B18 | Atp2p  | ATP synthase subunit beta                          | YJR121W | 146 | 51 | 1.90E-11 | 54760  | 17 of 38 | 48   |
| 62 | 23  | Bfr1p  | Nuclear segregation protein                        | YOR198C | 106 | 51 | 1.80E-07 | 54606  | 12 of 33 | 27.2 |
| 63 | 67  | Stm1p  | Suppressor protein                                 | YLR150W | 77  | 51 | 0.00013  | 29977  | 9 of 46  | 34.4 |
| 64 | 105 | Cdc48p | Cell division control protein 48                   | YDL126C | 212 | 70 | 3.30E-14 | 91939  | 21 of 27 | 29.6 |
| 65 | 108 | Cdc48p | Cell division control protein 48                   | YDL126C | 103 | 70 | 2.60E-05 | 91939  | 9 of 12  | 14.4 |
| 66 | 113 | Vma1p  | V-type proton ATPase subunit A                     | YDL185W | 111 | 51 | 4.20E-06 | 118562 | 23 of 60 | 21.9 |
| 67 | 20  | Vma2p  | V-type proton ATPase subunit B                     | YBR127C | 60  | 51 | 0.0066   | 57713  | 8 of 32  | 23.6 |
| 68 | 73  | Sis1p  | Protein SIS1                                       | YNL007C | 92  | 51 | 4.30E-06 | 37567  | 9 of 21  | 25.6 |
| 69 | 60  | Rnr4p  | Ribonucleoside-diphosphate reductase small chain 2 | YGR180C | 92  | 51 | 4.90E-06 | 40029  | 11 of 24 | 31   |
| 70 | 87  | Bgl2p  | Glucan 1,3-beta-glucosidase                        | YGR282C | 60  | 51 | 0.0068   | 34097  | 7 of 25  | 25.6 |
| 71 | 124 | Bmh1p  | Protein BMH1                                       | YER177W | 122 | 51 | 4.60E-09 | 30073  | 14 of 35 | 43.8 |
| 72 | 126 | Ola1p  | Uncharacterized GTP-binding protein                | YBR025C | 102 | 51 | 4.60E-07 | 44146  | 9 of 14  | 30.2 |
| 73 | 62  | Ynn4p  | Uncharacterized protein YNL134C                    | YNL134C | 67  | 51 | 0.0015   | 41139  | 8 of 26  | 30.9 |

LC-MS/MS

| Protein | Description | ORF   | Mascot score                                                       | Precursor mass [Da] | Peptides matched | Sequence coverage [%] |    |    |
|---------|-------------|-------|--------------------------------------------------------------------|---------------------|------------------|-----------------------|----|----|
| 74      | S17         | Srp1p | Importin subunit alpha                                             | YNL189W             | 329              | 60404                 | 11 | 8  |
| 75      | S37         | Sgt2p | Small glutamine-rich tetratricopeptide repeat-containing protein 2 | YOR007C             | 1048             | 37195                 | 62 | 55 |
| 76      | S11         | Pdi1p | Protein disulfide-isomerase                                        | YCL043C             | 643              | 58191                 | 23 | 11 |
| 77      | S19         | Pdi1p | Protein disulfide-isomerase                                        | YCL043C             | 183              | 58191                 | 7  | 6  |
| 78      | S30         | Pdi1p | Protein disulfide-isomerase                                        | YCL043C             | 212              | 58191                 | 10 | 7  |
